# Supplementary material for: Spermidine and 1,3-Diaminopropane Have Opposite Effects on the Final Stage of Cephalosporin C Biosynthesis in High-Yielding Acremonium chrysogenum Strain
Source: Int J Mol Sci. 2022 Nov 23;23(23):14625. doi: 10.3390/ijms232314625 (PMC9738377; doi:10.3390/ijms232314625)
Supplement: Supplementary file 1 [file ijms-23-14625-s001.zip]

Archive with 4 entries (4 files):
- Description of Supplementary Materials.pdf
- S1 Figure.tif
- S2 Figure.tif
- S3 Figure.tif
